# Supplementary material
Source: publisher figshare collection journal article supplement (https://acs.figshare.com/ndownloader/files/4624774)
Supplement: Supplementary file 1 [file 4624774]

**Figure S1**

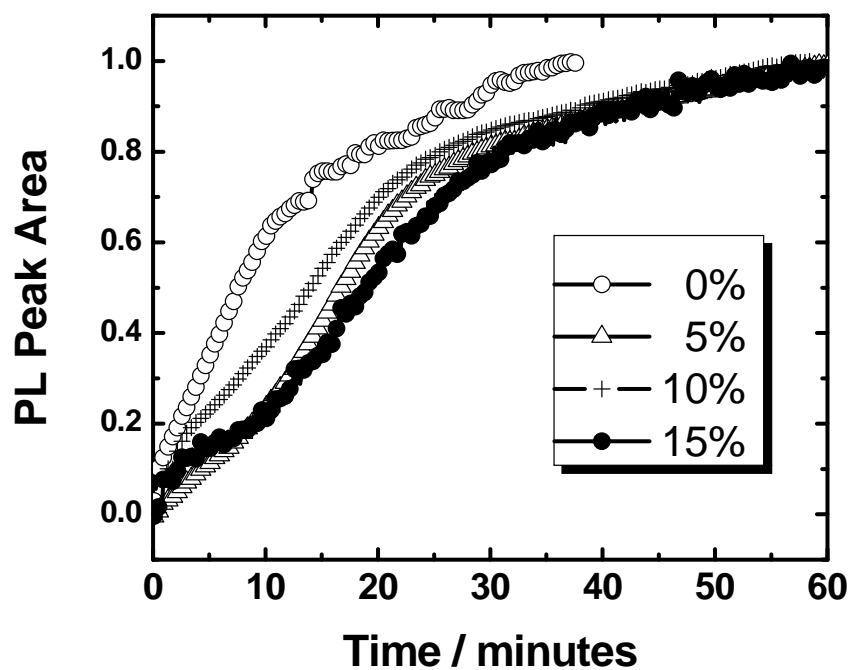

**Figure S1:** Photoluminescent peak area evolution of core-shell quantum dots during ~1 hr of ZnS shell growth. The presence of  $\text{In}^{3+}$  does not significantly alter the rate of ZnS shell growth.
